# Supplementary material for: Regional and global climate for the mid-Pliocene using CCSM4and PlioMIP2 boundary conditions
Source: Copernicus journal article supplement (doi:10.5194/cp-2017-21), 2017-02-24
Supplement: Supplementary file 1 [file cp-2017-21-supplement.pdf]

## Supplementary Material

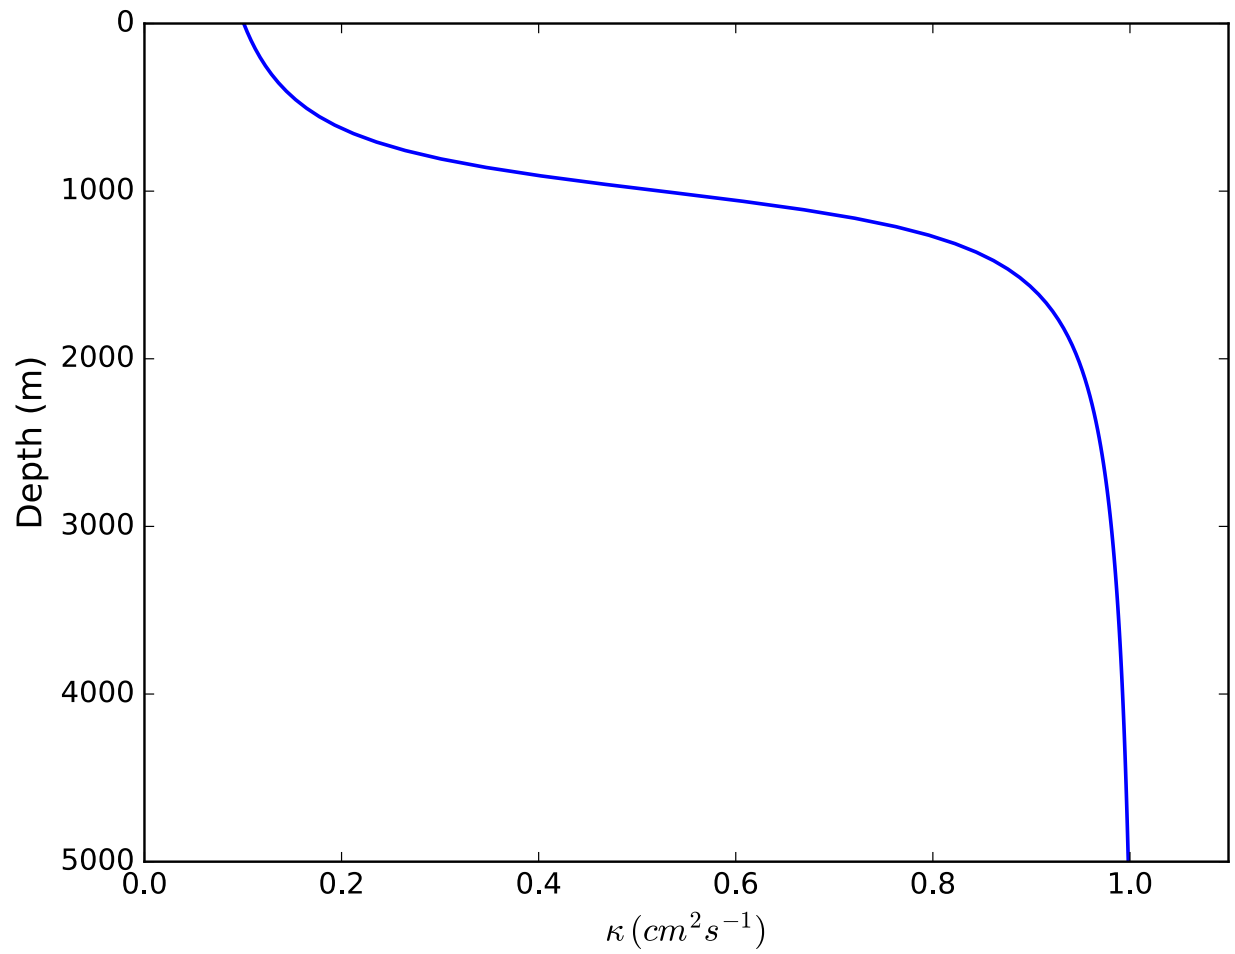

**Figure S1.** Depth-dependent profile of the diapycnal diffusivity ( $\kappa$ ) that was used in the ocean component, POP1, of the CCSM3 model.

Mapping between the 9 mega-biome mid-Pliocene vegetation of Salzmann et al. 2008 to CLM4 Plant Functional Types (PFTs) that we have used to initialize the vegetation distribution in our mid-Pliocene simulations.

| Mega Biome | One or more PFTs to which we map | Fractional projection on each PFT |
|------------|----------------------------------|-----------------------------------|
| 1          | 5, 7                             | 0.8, 0.2                          |
| 2          | 2, 6, 8                          | 0.5, 0.4, 0.1                     |
| 3          | 15, 1                            | 0.8, 0.2                          |
| 4          | 15, 1                            | 0.8, 0.2                          |
| 5          | 1                                | 1.0                               |
| 6          | 8, 14                            | 0.8, 0.2                          |
| 7          | 3, 12, 4                         | 0.7, 0.25, 0.05                   |
| 8          | 13                               | 1.0                               |
| 9          | 13                               | 1.0                               |
